# Supplementary material for: Neuronal calmodulin levels are controlled by CAMTA transcription factors
Source: eLife. 2021 Sep 9;10:e68238. doi: 10.7554/eLife.68238 (PMC8428840; doi:10.7554/eLife.68238)
Supplement: Supplementary file 2. [file elife-68238-supp2.xlsx]

## Sheet: Sheet1
URX/AQR/PQR	RMG	BAG	AFD
nlp-18	C13A10.2	F59C6.18	Y41C4A.17
Y41C4A.17	atp-6	M199.9	cmd-1
egl-46	K09F6.9	flp-19	F13H8.5
C34F11.2	F48C1.9	mrp-2	tre-4
ben-1	nduo-1	T03G11.10	K09F6.13
Y55F3BR.6	flp-33	irg-1	B0205.13
Y42A5A.3	ctc-3	ins-6	cdka-1
zig-4	ctc-2	set-27	B0205.14
flp-19	ctb-1	clec-190	M03E7.1
mex-3	ttr-16	srt-28	W01B6.8
lgc-12	MTCE.30	F27E5.7	C48D5.9
rgs-7	zip-2	osm-10	F14D7.14
nlp-11	T12B3.1	Y69A2AR.19	rbd-1
math-22	B0205.14	nlp-1	B0496.17
Y37H2A.13	bus-8	alg-3	ins-39
abcx-1	T26C5.4	cmd-1	F13H6.5
cky-1	C38D9.2	C50H11.8	C06E2.2
flp-9	K09F6.10	F18A1.1	T23F6.2
srsx-31	cal-8	Y41C4A.17	C49G7.12
cest-27	nduo-4	K08E4.7	C14H10.2
ins-4	nduo-2	sqt-2	ltah-1.2
K02E2.5	unc-116	ZC132.3	wht-3
C54G4.7	nduo-6	T15B12.2	nlp-55
C25B8.8	ctc-1	wht-6	flp-34
linc-64	nduo-5	B0244.9	M01G12.7
T27E4.7	pud-3	ZK686.5	hum-5
cpr-1	Y39B6A.1	oac-14	nhr-6
F35F10.10	E04D5.5	Y6E2A.10	sdz-35
fbxa-60	C33B4.4	B0379.7	F36G3.3
npr-29	F08F1.4	hpo-38	C33D9.8
W03F8.2	crb-1	T09A12.1	tkr-1
F54D1.6	ilys-5	K06H7.8	ugt-50
dos-1	myrf-2	ZK1225.5	srh-275
C48D1.5	frpr-5	T23F6.3	F39B3.3
ins-25	K02B12.9	C06C3.11	T25G3.3
K06A4.8	cmd-1	ins-10	srz-85
ZK896.1	osm-10	nspc-20	C45E5.4
acp-6	daf-14	snf-7	hcp-6
cdd-2	unc-53	ZC581.10	dgn-1
F31F7.2	pab-1	K06A4.6	tth-1
chil-15	Y37H2A.13	F49C12.15	lin-42
F35E2.9	F41E6.15	F26A3.4	F58E2.2
tmc-1	B0361.4	ZC334.13	F49E12.8
lgx-1	perm-2	nspc-13	gcy-37
frpr-7	linc-85	smoc-1	arf-1.1
eat-5	abts-3	not found	F57F4.2
M01G12.9	eef-2	Y38F1A.7	acy-4
nlp-53	fipr-2	ins-9	lip-1
ZC504.1	acr-2	mig-23	nlp-45
F54E2.1	chdp-1	F36A2.11	srd-55
ZK742.7	Y45F10C.2	hex-2	T23B5.3
ins-3	Y41C4A.17	dao-4	tbb-6
C44H4.8	B0205.13	grd-6	F59G1.4
F16B4.2	MTCE.33	nhr-281	srt-73
nhr-213	rab-3	Y37F4.5	EGAP1.1
lact-3	F59C6.18	ZK1225.4	cyp-43A1
C34E7.4	spp-15	Y73F8A.20	sdn-1
nlp-21	cpg-9	F46A9.1	unc-93
F47B8.2	C17E4.4	F36H1.11	ttr-38
tbb-6	pat-10	C23G10.10	sod-4
K10B4.3	ggr-2	snf-5	oac-3
F20D1.3	nhr-56	ZC132.11	cest-32
pqn-83	R02D5.7	F13B12.4	nhr-230
Y38H6C.24	B0513.4	F26C11.1	ZK1055.7
lgc-36	iglr-3	ugt-57	linc-151
cmd-1	F35B12.3	C44C10.14	nlp-16
Y37H2A.14	F56D6.17	R102.10	F18C5.10
F16C3.2	lys-4	tab-1	cox-14
C44B11.4	dhc-1	not found	nhr-38
flp-12	C16D9.5	nhr-186	ben-1
Y43D4A.5	pgp-2	arrd-28	C30F2.2
chil-18	sdz-27	Y48G8AL.16	ZC434.10
F09F7.5	F59A6.12	tag-344	irg-2
ZK822.1	hum-5	abcx-1	B0457.4
nlp-56	mnk-1	F09E5.16	cst-1
F54E12.2	F36H1.12	Y92H12BM.1	srh-130
F55C5.2	H29C22.1	K07F5.8	str-123
R09D1.13	K08B4.7	nspc-9	not found
ssp-35	D1086.12	T02B11.9	C33B4.2
del-3	let-60	pgph-2	glf-1
F42E8.1	D2096.5	nhr-204	srp-8
M03E7.4	spp-18	fut-4	F38E11.8
tsp-4	ttr-26	F49F1.5	gmps-1
phf-30	K07C10.3	Y37H9A.2	F53E4.1
sptl-2	glr-4	tts-1	C02B8.3
Y7A5A.3	nlp-21	Y73B6BL.288	F56A8.9
tsp-5	gsa-1	F56D6.22	chdp-1
ins-29	flp-25	irld-2	F18E9.4
irld-2	spp-2		dop-5
C47E8.9	msi-1		W09D10.1
cest-32	linc-45		ZC434.3
srt-53	F46A8.13		R151.1
cca-1	cwp-1		enu-3.6
str-259	C10H11.7		arl-7
tba-4	F57C9.6		snt-6
ZK265.7	C55C3.3		Y73C8C.8
K10D6.2	nlp-49		kqt-2
W06F12.2	sec-31		xbx-1
F57B9.3	F14H12.7		Y46G5A.36
T03F6.8	ztf-27		Y105C5A.25
srh-210	frpr-6		Y38H6C.24
fbxa-98	gta-1		C05B5.8
pos-1	enpl-1		sto-1
Y69E1A.8	nlp-51		F42A9.9
C01G5.25	add-2		nlp-19
cchl-1	rab-10		cpd-2
sprr-1	T23B5.3		ttr-9
tsp-7	unc-2		jmjd-3.3
str-138	C54F6.17		T08G11.4
ZC239.22	Y44A6D.2		pfn-3
linc-19	ZC443.1		F46A8.11
ins-24	nspc-7		cest-27
srb-19	T01C1.4		K02A2.5
zig-10	Y37F4.15		C16D2.1
bus-8	Y105C5A.15		Y23H5B.1
tba-7	linc-19		C26B9.3
lgc-10	F56D6.16		nekl-4
C27A7.8	bro-1		srtx-1
Y73F8A.33	prx-1		hsp-25
nlp-7	F56D1.1		Y82E9BL.12
nhr-183	T04G9.7		C39D10.11
Y71G12B.31	clec-222		parg-2
C08E8.4	T03F1.11		rft-1
C30B5.7	Y39G10AR.32		gcy-5
K06A4.6	Y4C6B.7		Y49G5A.1
ZK1307.7	C05D12.7		C24A11.1
nhr-117	cwp-2		W02A2.9
ZC404.16	maf-1		cku-80
sodh-2	T23F11.4		ilc-17.1
ZK1320.14	C08F11.12		C23H4.6
C23H4.6	asp-6		lim-7
Y47G6A.5	F54F7.3		ooc-5
F55D10.4	C07G1.7		npr-15
K09F6.9	atrn-1		acr-19
B0393.9	dct-16		hbl-1
dmsr-8	Y40B1A.1		C33B4.4
srd-54	Y34B4A.6		Y39A1A.9
pamn-1	droe-4		C06A5.8
nhr-91	cyp-33C8		F28C10.3
linc-56	nlp-17		ZK1055.6
F46F2.4	gbb-2		lon-1
sma-5	F40E10.6		nhr-43
ugt-56	spp-14		scbp-2
nhr-115	rrf-2		Y40H7A.4
E03H4.5	K03B4.2		21ur-13850
msrp-7	pdi-2		snt-7
F25B3.4	C53A3.1		C03H5.6
chil-24	K02E11.6		F21C10.4
nlp-1	Y43F8B.2		F56A4.3
arl-7	F41G3.18		gst-39
srh-201	T20G5.12		ZK662.2
pfn-3	spc-1		ZC504.1
lov-1	ule-2		eri-12
Y40C5A.4	K09F6.13		C13G3.1
cutl-14	B0507.3		ZK6.11
cars-2	F45B8.5		C08D8.1
hex-5	Y105C5B.5		F15G9.1
glb-12	aars-1		T27A3.7
Y38A10A.2	ule-4		K09H9.9
str-139	unc-75		myrf-1
nas-5	bpl-1		ins-5
nhr-231	gut-2		fbxa-71
C06E7.95	far-2		clhm-1
zig-3	rrf-3		F47B8.2
WBGene00044566	ins-19		lury-1
ckr-2	ctsa-1.1		C44H9.4
clhm-1	M153.4		sumv-2
tbc-19	K02F3.9		F17C11.11
slc-36.4	let-607		tre-2
Y49G5A.1	del-8		F56F11.1
sre-4	tre-4		sta-2
pqn-10	blos-7		str-256
cdr-4	tmem-17		clec-79
grl-8	Y71F9AL.12		rheb-1
vha-18	R13H4.2		catp-7
F22E5.6	zig-8		prk-2
F43C9.2	nlp-63		tag-151
tkr-2	not found		col-107
Y71F9AL.4	mec-12		W02C12.2
ins-2	ceh-89		emb-27
D2007.2	linc-73		ceh-23
D1081.3	fut-8		F46H6.5
Y69H2.15	ZK177.9		T07C4.12
npr-14	F10G7.10		xpo-2
srsx-30	abf-2		T20G5.12
rig-1	B0035.13		F46A8.1
tag-322	tag-180		dnc-4
cutl-8	F23H11.2		comt-3
R11D1.12	gnrr-2		cuti-1
C45B11.6	unc-9		C34F11.8
D2096.5	F58H1.7		C47E8.3
cpl-1	ckr-1		best-22
pri-1	T01H3.5		nud-2
C50H11.8	not found		T27C4.1
nab-1	slo-2		set-12
mboa-4	tpi-1		F49C5.9
ZC132.11	lbp-2		F56D3.1
M60.4	C01H6.3		nhr-76
K01A6.6	Y106G6G.2		Y54E2A.10
dmsr-12	ZK512.7		T05H4.15
Y87G2A.16	ntl-3		rsp-2
Y111B2A.1	nlp-82		Y94H6A.2
srx-2	C10C5.7		lron-1
nas-31	col-91		gtr-1
fbxa-144	gst-13		H41C03.2
K08H2.10	mab-20		F53F8.3
21ur-2174	F39B2.8		ist-1
ska-3	ZC404.15		F32D8.7
Y54G2A.15	Y59H11AR.6		mdt-1.2
srh-17	C37A5.11		tes-1
lbp-4	W02D9.6		F07F6.8
ins-1	T10B10.4		W08E3.4
istr-1	Y65A5A.1		R07B7.6
dmsr-6	clec-266		tsp-12
tiar-2	ptp-3		C47E12.2
lgc-41	C05E4.15		F08B12.10
M199.9	fipr-13		rrn-2.1
C18A3.7	E01G4.3		F07D3.3
oac-18	unc-70		R05D3.2
F47B10.3	F16B4.2		glb-21
Y37H9A.4	lsm-8		dap-3
linc-128	idi-1		pqn-92
frpr-6	C53B7.3		ZK353.9
D2007.1	W07E11.1		rrf-2
ZC404.15	lron-9		sek-3
lec-3	Y54G2A.52		cyp-36A1
ZC239.14	Y50D4B.10		R10F2.4
F42C5.3	fmi-1		baf-1
chil-16	nduo-3		gcy-29
phf-33	H40L08.1		unc-33
F14D7.8	irk-1		C12D8.21
C52E4.12	spp-16		nhr-117
F53C3.6	F33H2.2		21ur-7170
C05G5.5	snt-3		F53B7.12
F09A5.3	Y62H9A.5		nhr-37
kqt-2	21ur-7170		C17H12.10
lst-4	srsx-33		F37A4.10
F40F12.9	C53C7.5		glna-1
K06A4.2	C15H7.3		kcc-3
F59B10.3	glb-18		D2063.1
eol-1	unc-79		Y75B8A.39
dach-1	rbm-39		mtcu-1
efhd-1	C33A12.19		abtm-1
C04A11.2	W08A12.2		abcf-1
ZK1055.7	argk-1		pgp-1
cyp-33C4	C02F12.5		ssp-35
clec-63	W05H9.1		F10G2.2
D2023.3	ugt-63		Y73F4A.2
dmsr-11	inx-8		flp-9
F36H12.3	glr-5		T05C1.2
Y7A5A.5	T22E5.1		F14F9.4
Y49E10.25	mef-2		C05B5.2
ZK180.6	R09H10.7		srh-166
cil-7	abf-6		ubc-3
sem-2	ZK863.8		not found
F54F11.1	F59A6.3		asd-2
sto-1	Y69E1A.5		T01B7.13
C04F12.1	F32B4.5		C01A2.4
cul-6	rde-10		gcy-7
chil-1	Y73B3A.18		C15H11.16
K09F6.11	F36D1.7		arrd-28
T11B7.1	Y87G2A.19		F08D12.2
sod-4	not found		R07E4.1
C18B10.6	C31B8.7		Y105C5A.15
21ur-13011	F09F9.4		T14G10.8
F45D3.4	ZK637.14		let-611
21ur-3835	B0238.12		hlh-11
Y38C1AA.19	Y51H7C.8		ess-2
glb-8	erm-1		ZC168.2
T03F7.6	clec-47		linc-135
fbxc-6	ndx-4		C03H5.5
txt-10	K11D12.13		F41E7.9
H25P06.5	tre-1		nhr-179
ZK418.2	skr-21		B0496.2
kvs-4	wrk-1		rop-1
cyp-34A1	K08E7.8		sdz-34
M04B2.7	F45D3.2		C04F5.8
C36F7.5	ppk-1		nhr-183
ZK721.3	hsp-12.3		nhr-138
T06E6.15	mcd-1		spe-12
oac-54	Y54F10BM.9		kpc-1
glb-18	C30F2.4		K10C8.4
R09D1.4	glb-19		igcm-4
nlp-63	Y54E10BL.3		F25B3.2
tsp-1	R09H10.3		C44C10.11
eat-16	ZC449.4		21ur-1004
kcnl-2	hint-1		21ur-12928
K09F6.10	nlp-11		Y40C5A.4
ttb-1	Y11D7A.3		T23F6.3
C31H2.3	F55D1.3		hlb-1
T07E3.3	M199.9		K09F6.10
F15D4.4	T05E11.9		F26F4.8
B0361.4	Y41E3.7		ZK121.2
slc-17.7	C31C9.7		nars-1
C13A10.2	slc-25A10		lpin-1
T09D3.3	pde-6		nhr-238
F40G12.10	F17E9.4		cdo-1
ZC132.3	adr-1		nhr-100
T26G10.5	ida-1		sri-20
twk-30	catp-7		C52G5.10
F09G8.5	F21C10.9		F53A2.1
srh-25	srz-85		prkl-1
F12F6.7	nlp-39		K02A6.2
ttr-31	C08A9.10		Y54G2A.18
sdz-35	arf-1.1		ttr-22
C04A11.1	Y43B11AR.1		F35F11.2
dmsr-5	manf-1		mrpl-37
pxn-1	popl-5		T10B10.4
mir-5548	nlp-46		T06F4.1
ethe-1	lec-4		C05G5.7
Y26D4A.5	nlp-47		K08H2.3
E02A10.3	C35B1.4		Y51H4A.1
skr-4	unc-68		W02D7.6
cah-3	ZC21.3		not found
trh-1	pud-4		T26A5.6
C50B8.4	chd-3		C12D5.5
flp-8	cacn-1
fbxa-210	mix-1
F21F3.7	nlp-34
C47E8.3	Y46D2A.1
F37B4.15	F15G9.1
M03E7.1	ncs-2
unc-87	col-77
nex-3	linc-34
srp-2	atln-2
F13H10.6	dnc-1
exc-6	F21C10.11
meg-2	nhr-3
gsp-3	Y32F6A.5
smz-2	F09E10.7
H10D18.6	F31C3.3
T10H10.2	pmk-1
ced-8	unc-115
Y57G11A.2	F34D10.8
srh-127	F39E9.10
C27D6.11	K02E10.7
nhr-85	tra-1
T20D4.7	H32C10.1
snt-2	nhr-187
F48G7.4	skpo-1
Y51H7BR.4	rol-1
21ur-4409	C14H10.2
tkr-1	vrp-1
nlp-41	M28.5
T01G5.7	stau-1
sld-2	K08D12.8
ins-17	vps-25
nhr-239	dhs-21
T22F7.4	gfi-2
C35A5.14	F02A9.1
chdp-1	T07A9.10
cyp-14A3	gmn-1
C09F5.1	hrpr-1
asp-5	C01G5.25
M04B2.6	ins-28
ZC21.10	linc-38
F47B10.9	R02C2.7
E01G4.7	C47G2.4
mre-11	uev-1
egl-1	toe-4
K03H1.12	Y79H2A.2
ZK177.9	C14C6.5
WBGene00008867	R102.1
scyl-1	tnc-2
C52E4.7	R10E12.2
skr-3	fubl-1
C31B8.7	C46C2.5
F13D2.1	not found
tat-4	F54F7.2
taap-1	F59A7.8
M01A8.1	Y45F10C.4
C06E2.5	sart-3
dmsr-16	ZK524.4
tbcc-1	C12D5.5
ZK418.10	lin-5
glb-3	clec-221
C54F6.15	pmk-2
lit-1	EEED8.2
K08D8.6	F09G8.7
C18E9.2	ints-4
act-2	Y71H2AM.10
rpa-2	C18D11.6
C08F8.6	Y47D7A.15
mai-1	ost-1
deg-1	ZC404.2
prx-5	pnc-2
syx-2	lbp-1
21ur-10992	F58A6.9
R07H5.9	lfi-1
ins-27	taap-1
F52E4.5	shc-1
col-106	dnj-20
F26D11.1	ubc-14
F55D1.3	aat-1
bath-1	cnb-1
C15H11.16	anmt-1
F42A9.9	ace-3
ZK1055.6	gcy-36
glb-27	C50F4.8
T21H3.1	C03A3.1
R13H7.2	fbxl-1
W02D9.10	ttr-24
sra-10	prcc-1
F33E2.5	rsbp-1
gst-40	F48E3.4
abf-1	F59A7.14
flp-15	mlc-3
F54C9.3	F11G11.4
str-156	Y73F4A.2
plp-1	F21F3.7
msp-36	F01D5.5
C51E3.6	C28H8.3
F37A4.6	linc-128
Y45F10B.3	R02F11.4
ceh-57	Y22D7AR.10
R08F11.7	pyr-1
F14H12.3	tag-18
21ur-15344	plx-1
21ur-7400	C06C6.8
srd-70	dhs-26
Y43C5A.2	npp-21
C54D10.5	nhr-103
F54B11.4	F31F7.5
Y43D4A.2	cogc-2
T20D3.2	D2045.2
F58B4.6	nlp-28
hum-5	H04M03.12
nhr-138	mvk-1
DY3.9	C54C8.12
mtrr-1	T28F4.4
ckr-1	scd-1
Y57A10A.2	W02B8.2
srh-159	gcy-32
F16C3.4	ekl-6
F07C3.3	lem-4
K09C4.5	C30G7.2
E01G4.3	T10B5.2
moc-5	F56A4.3
T12A7.2	ZK1320.11
T08H10.3	C08F11.7
C49C3.4	F56C9.8
fbxa-24	F59C6.3
allo-1	npr-4
gcy-33	MTCE.10
C06E7.4	tank-1
C06E7.2	C51E3.10
K09F6.13	gcn-1
srv-6	mutd-1
sbt-1	npr-2
F09C12.2	K01D12.6
fox-1	C33F10.12
hyl-1	nhr-71
mel-26	F49C5.12
ctg-2	Y38H6C.23
sru-13	gly-12
T02C5.1	acy-1
fipr-13	mog-2
slcr-46.1	crh-2
Y111B2A.3	E03H12.5
F21C3.6	rnp-9
C17G10.3	mlp-1
F09F9.5	ZK470.2
D1081.6	lmtr-5
cpr-4	F25G6.9
Y45F10D.16	chc-1
W03D8.5	pad-1
F36G3.1	B0025.4
nhr-59	clp-4
C44F1.1	F46F2.12
nekl-1	snx-13
bec-1	H03E18.2
F57G12.1	Y65B4A.9
clh-2	cgef-1
B0379.7	evl-20
H03E18.2	C17F3.3
T16A9.5	unc-69
M03B6.1	grd-6
C53B4.2	lbp-3
F22E5.13	B0261.8
D1065.3	C45E5.4
Y60A3A.16	Y39A3CL.3
klc-1	msa-1
msp-77	Y97E10AR.1
F02A9.7	perm-4
cylc-1	Y110A2AL.4
unc-53	akt-1
cri-2	C44B11.6
F58F9.1	scl-25
F36H12.4	ceh-5
C29F4.3	nhr-68
srr-4	ced-8
aqp-9	dod-6
linc-168	vps-51
linc-45	emc-3
dmd-7	dct-1
linc-84	dpy-23
fbxa-211	anr-36
Y71F9AL.12	anmt-2
msrp-2	mce-1
Y43C5B.3	trpp-9
asp-2	R07E4.5
Y75B8A.39	F36F2.1
rilp-1	F40A3.6
gpa-13	lrp-2
chhy-1	C04E6.11
cyp-33C7	T28F4.5
C10C5.5	F32H5.3
far-5	pes-7
T23B12.5	C25F6.1
F49E10.2	R13H4.7
msp-49	T05A12.4
fbxa-81	CD4.1
Y70G10A.3	unc-77
msrp-5	C11H1.7
mdt-22	T24F1.7
nspd-2	K07A1.6
copb-2	Y53F4B.45
F58H7.5	Y71F9AL.11
T23B3.2	tatn-1
ZK1010.8	atp-1
C34F11.1	gex-3
ZC376.8	pmt-2
F59A6.2	Y55F3BR.1
zip-2	bli-6
clp-4	clec-91
pgp-8	ced-7
mks-6	K12H6.4
msd-2	M02H5.8
alp-1	ugt-50
R13A1.10	glb-13
F22F4.5	ZC239.5
fbxa-42	F25E2.2
T22B3.3	pmp-1
lys-8	hlh-17
cln-3.1	D1086.10
rab-37	vamp-8
C45B11.8	Y73F4A.3
hrg-1	W09D6.5
tat-3	B0495.9
dapk-1	K07A1.15
slc-28.1	ttbk-3
T01E8.8	C25H3.10
F10E7.2	K02E2.6
hosl-1	Y50D7A.10
sol-1	ZK813.3
ugt-31	E02H9.6
C10C5.3	gst-11
ulp-5	K03B4.4
Y77E11A.23	rrn-2.1
T28H11.8	kcc-3
C28C12.1	lpd-7
mrpl-22	R12G8.1
M03C11.1	C06E7.92
linc-10	rap-1
C15F1.8	mdt-11
mop-25.1	ifa-4
ubc-23	R07E5.11
D1081.11	trh-1
str-245	F02E9.7
T23B3.5	F58F9.10
abts-3	D1086.3
msp-3	mau-8
C02F5.5	cht-3
inf-1	cpn-3
asp-1	ZK354.2
ZC581.3	dpm-1
C40A11.6	elo-5
ccnk-1	gcc-1
F58B4.2	Y59E9AL.6
msp-76	F08H9.4
frk-1	asp-14
F26G1.5	C46C2.3
ZK596.1	gtf-2F2
F15G9.1	F10G7.9
K06G5.1	frpr-13
srh-92	acdh-10
fbxa-93	ama-1
ccdc-47	clp-9
cey-4	C17F4.2
C06A8.6	gtf-2A2
linc-149	lin-59
apx-1	gale-1
T23G11.1	F40F8.4
F15H10.7	aqp-2
dhc-3	C08E8.4
glb-9	C27C12.1
Y59H11AR.4	flp-7
C11E4.8	smz-1
F36H12.14	snt-2
F54B11.5	tyra-3
C17F4.2	puf-9
sto-2	Y39B6A.30
snb-6	pph-1
Y102A5C.6	Y57G11C.33
B0207.10	K11H12.9
C06C6.8	C18D4.12
magu-4	R11G10.3
tsp-8	ckk-1
ZC449.4	D2030.12
endu-1	irg-4
srh-39	C53D6.7
ttr-34	T23F2.5
F58E6.5	hex-1
lact-1	rpl-14
mboa-3	T03F6.10
C06A5.8	Y47D3A.32
prmt-1	Y17D7B.7
ugt-48	hpo-26
K08F4.5	Y48G1C.9
dex-1	Y46G5A.8
rab-6.1	B0511.12
wht-1	chup-1
F21F3.2	snet-1
C39D10.2	vps-29
C05D9.7	F42C5.4
R07E5.4	inx-6
acs-21	ppm-2
K11C4.2	srp-8
ZK813.4	nsf-1
F13B12.15	pdi-1
K07E12.2	lgc-36
dre-1	ceh-32
nhr-232	tag-294
pigx-1	epc-1
msp-33	F32D1.3
C15H11.12	lec-6
F07F6.8	tkr-1
Y43C5B.2	cpl-1
phy-2	Y49G5A.1
W03G11.4	ttx-1
F10C1.3	nfyc-1
srd-23	gcy-12
C30B5.16	sri-8
twk-23	haf-7
Y38H6C.13	uba-1
T23G5.2	popl-7
F16C3.3	eva-1
tpxl-1	C39B5.2
spp-2	F33E2.4
C46E10.1	T23B3.2
F02C12.1	F36H1.11
klp-12	rpn-6.2
F02D8.4	Y106G6D.3
F20D6.11	T20G5.9
F32D1.7	C04G6.5
F53B2.8	frpr-19
asp-3	K07A1.13
cdh-9	nhr-6
ajm-1	E02H9.7
sre-6	C34F6.11
ZC239.5	R06F6.8
pud-4	H24G06.1
F41G3.5	mps-2
W10C4.1	hxk-3
Y59H11AM.4	T25B9.12
timm-23	Y54E10A.11
C04E6.7	igeg-1
dmsr-2	C17G1.2
W08E3.4	ets-4
F53A2.9	T02B11.8
W06D11.1	gcy-37
F19B6.8	sws-1
srt-63	Y54G2A.40
nspd-1	test-1
R03H4.8	K07A12.1
C51E3.10	srh-237
B0207.2	Y7A9D.1
mpst-1	H17B01.5
msp-64	C08F8.6
F55H12.2	T28H10.3
aexr-2	col-161
F57B9.1	trpp-10
F07G11.1	lec-11
lsm-4	hil-7
C02D5.2	K08C7.6
ttr-36	Y48G9A.9
unc-47	C02E7.7
mtm-6	efr-3
F10E9.17	C36C5.12
C27F2.6	psd-1
best-1	tsp-20
col-8	pde-3
F36F12.7	F16C3.1
vps-4	F44G4.7
D2096.9	B0252.8
pkg-2	ZK1010.10
C32F10.4	ifb-1
tnt-2	F53H4.6
soc-2	erd-2.2
snb-2	F16B12.4
C05A9.2	tba-1
ssp-10	ZK593.3
C04G2.3	ssp-37
T10B10.4	H23N18.5
R03H10.6	gpa-2
C09F12.3	hyls-1
Y106G6H.1	klu-2
msp-81	hint-3
nmur-1	F31A3.3
rpi-1	gst-5
msp-31	linc-8
R02C2.8	svh-2
usp-14	pid-1
DC2.5	his-70
Y55F3C.17	mec-7
F09B9.4	sri-40
D1081.10	F59E12.6
osta-2	W04B5.1
tsp-21	Y47G6A.33
fbxa-153	H05C05.4
linc-85	T20G5.8
37165	C33G8.4
sprr-3	unc-42
21ur-10817	nduf-5
nep-16	gst-41
C18E3.3	F26C11.3
Y54E10A.17	mev-1
cwp-2	col-73
mab-7	ssq-2
col-122	dhhc-3
F43G6.8	F32F2.3
nlp-40	top-2
lgc-53	slc-9B.2
him-6	Y47G6A.36
ZK105.1	F11C1.7
unc-38	T04F8.8
spp-14	F01G12.18
C24D10.49	E03H12.7
ZK863.1	R10E8.10
acr-11	F42A9.9
acox-1.5	R09F10.5
WBGene00009379	ule-1
F12F3.8	F36H12.3
ZK354.3	sir-2.1
21ur-14059	bcat-1
Y38C1AA.7	col-142
K08C9.2	F28B3.10
B0244.9	ZK1055.7
efn-2	C05G5.1
C54F6.17	C16B8.3
F13A2.4	Y34B4A.9
col-119	R10E11.6
fbxa-66	T22B3.3
parg-1	K09D9.1
grdn-1	natc-1
W05E10.2	pqn-41
C09H5.7	dnj-18
F17E9.5	acl-1
msp-19	ceh-41
nhr-100	W04A8.4
tsp-2	C39E9.8
H24G06.1	mes-6
C44H9.4	Y97E10AR.6
W09C3.8	D2013.6
F23B2.7	tag-234
chup-1	Y48G8AL.12
F34D10.8	ears-1
F47B3.4	C37A2.7
F22F1.3	fipr-18
did-2	sem-2
plst-1	D1086.6
ZC204.12	rskn-2
C27C7.1	dhhc-4
Y46G5A.6	hlh-16
msp-40	set-20
epac-1	tat-2
kcnl-4	T05F1.8
fbxa-6	AH9.4
magu-3	lsy-2
F36D1.4	C04G2.3
Y39G10AR.16	F39E9.26
K05F1.6	C06G3.3
nhr-42	gpb-2
fbxb-49	ilcr-1
rabx-5	cra-1
ugt-24	iffb-1
fat-6	ssu-2
msp-57	nxf-2
gnrr-6	tos-1
sri-18	F40G12.10
C35E7.9	Y92H12BR.4
T10B5.2	T22B7.7
coh-4	F56F11.1
eif-3.G	tpst-1
lurp-4	icap-1
Y43D4A.1	smg-8
ssp-34	ZC250.4
ZK512.10	din-1
C34D4.3	nhr-47
Y75B8A.44	tbc-18
F20D6.10	ndfl-4
F44G3.7	mboa-1
F31D4.5	linc-46
npa-1	F55B11.2
spp-3	msp-45
ssp-16	T26A8.3
Y53F4B.25	flp-26
nst-1	F37H8.5
cyp-35A2	cpi-1
fkh-7	C17F4.7
gln-6	nbet-1
pph-1	rpl-29
F42H11.1	spcs-1
swan-2	linc-25
C05G5.9	C35E7.11
lec-6	rpl-36.A
Y43D4A.7	gly-7
K08B12.7	arrd-28
T15B7.10	tps-1
C15C8.8	ZK1248.19
pgrn-1	mecr-1
F22B8.7	F23C8.5
F17C11.6	R11H6.2
msp-38	F49F1.15
nhr-58	F30H5.4
lron-9	prmn-1
C42D4.13	T04A6.2
nhr-94	taf-5
F38H4.4	W06H8.6
best-22	flp-8
msp-152	C35E7.9
F53C3.4	col-159
F14H3.6	tub-2
npr-3	unc-16
F56F11.1	arl-7
C35D10.3	D1022.4
F21H7.2	col-130
msrp-1	dylt-2
lgc-40	trap-4
F59B10.2	Y51H4A.1
rgl-1	zag-1
dsh-2	djr-1.1
ZK121.2	Y26E6A.3
M28.9	Y48E1B.8
coq-6	W01D2.1
Y43D4A.162	C05E11.7
cdap-2	mksr-2
ZK1010.5	C10A4.9
B0496.6	usp-33
aqp-5	snt-6
M28.5	zig-4
ceh-16	tmed-4
F33A8.13	eat-6
T09F5.12	rpl-11.2
Y53C10A.10	dep-1
gla-3	K01A6.6
dct-18	nhr-20
mrp-7	best-23
pgph-2	mbr-1
ZK354.7	lips-15
F46C8.3	F14F7.4
Y73B6BL.31	K03H9.3
F39H12.3	asp-4
pqn-88	C27A7.1
C30B5.13	Y43F8C.3
K02F2.5	R03H10.6
T04F8.8	ZC513.7
cox-14	F57F5.1
F25H9.6	acbp-7
lon-2	nipi-3
T23E1.1	Y57G11C.20
C10C5.4	F53H4.2
C39D10.6	hecd-1
vha-6	F52E1.9
C18A3.11	B0205.10
C34B2.11	M04C3.5
aak-1	Y54E5A.7
npr-8	F49E2.5
gpa-15	ZK353.9
stam-1	H06I04.5
B0252.1	C32D5.10
ttr-35	aex-6
rde-4	rps-9
F08B12.4	C08F1.8
ttr-45	pgp-9
F15A4.5	ric-4
pdhk-2	eif-2Bepsilon
nlp-57	mpk-1
B0034.7	unc-39
dpf-1	R144.13
21ur-6907	egl-9
tre-2	C48E7.1
F23C8.8	suf-1
F49E11.2	Y15E3A.5
T05D4.5	C04F12.16
nrde-1	F45E10.2
lin-48	Y87G2A.16
ife-1	egl-1
F52F12.5	gst-27
cest-9.1	mrpl-45
F25E5.5	acr-12
eif-3.J	cua-1
str-253	F52E1.14
R10E4.7	F53C11.5
C42D4.1	Y73B3A.17
msp-53	Y62H9A.15
F57C9.6	dgk-1
Y43F8B.9	gex-2
C33B4.2	nape-2
F36A2.12	Y12A6A.1
K09A11.1	R166.3
F32B4.12	Y38H8A.3
sqv-7	nhr-19
T21B10.4	C54F6.15
asp-6	C49C8.6
W05B5.1	F44G4.3
xbx-9	K09B11.4
R09A1.2	F07C3.2
zim-1	T09B4.5
Y39E4B.11	rab-35
C01H6.3	F07G6.10
R05H11.1	tam-1
nprt-1	T10E9.4
C08F1.8	clr-1
msp-45	nspf-3
linc-50	sri-60
F20D6.8	ZK550.5
Y60A9A.3	pkd-2
Y47D3A.13	R144.12
col-135	C09H10.4
nhx-1	F36F12.7
C02F5.12	syd-9
T06F4.1	MTCE.2
K07C10.3	unc-71
T02H6.7	T19A6.1
msrp-6	F54G2.1
H13N06.7	mdt-20
F54F12.1	K01A6.5
tat-2	jkk-1
srx-123	R02E12.4
hpo-30	Y37F4.5
eef-1B.2	F15E6.4
B0272.3	C53D5.5
C07G1.7	fipr-16
msp-56	T25G12.3
cic-1	C14B1.3
pdxk-1	ptp-4
ifg-1	ncbp-1
ngp-1	W07G4.8
famh-161	rad-50
F19B10.4	pab-2
fbxa-199	scd-2
R144.13	ZK970.7
spp-17	W08E12.8
tipn-1	T25B9.3
F41F3.1	T08D2.3
acs-22	K02E11.5
col-42	K02A11.4
nspd-10	nst-1
nadk-1	ZK546.4
msp-50	pigx-1
T04A6.2	F35H10.6
cyc-2.2	flp-1
nap-1	R08D7.5
Y106G6G.1	glb-30
C14F11.7	tba-9
C10G11.8	F09C8.1
Y69A2AR.47	cyp-13A9
T23F11.4	F23A7.4
rpa-1	C28C12.4
lgc-47	hic-1
Y41C4A.11	Y69A2AR.46
Y54E2A.10	F56F10.2
col-181	CE7X_3.1
F55A11.6	icl-1
rpl-11.1	Y51H7C.1
C03B1.2	Y39A1A.27
hdl-2	hcp-4
irk-3	col-76
K04D7.6	eef-1G
Y55F3BR.11	T02B11.6
21ur-7038	mys-4
H09F14.1	C35A11.2
Y50E8A.10	kin-1
21ur-7010	mrpl-30
hst-2	ule-3
sre-40	nlp-15
F35A5.2	col-49
mcm-5	rps-3
zip-3	valv-1
F25E5.9	slc-30A5
F28A10.12	his-24
21ur-9624	T15B7.1
K01D12.15	drn-1
nxf-1	Y38C1AA.12
AC3.5	lpr-6
K06A9.1	W09C5.3
cyn-2	col-175
F40E10.5	ast-1
F54D12.9	col-109
Y39B6A.3	T28F3.5
Y26E6A.2	bli-2
C44H9.5	glb-25
C15C7.4	T24B8.7
C32A9.1	lgc-47
F15B9.6	T20F5.8
mct-3	sre-6
Y43C5A.4	col-167
pcp-3	catp-8
Y106G6D.3	ZK856.7
ssp-33	ZK669.9
srb-15	C25E10.10
C17F3.3	flp-34
str-206	Y55F3BR.11
mlc-2	mlc-4
msp-59	dnj-4
nhr-112	dmd-6
pdfr-1	Y41D4A.4
warf-1	abhd-5.2
M116.5	F47D12.9
C09B9.4	T04F8.3
cytb-5.1	F19C6.12
npr-2	cpb-1
hum-10	cnp-2
C05G5.3	W04G3.13
ugt-30	nhr-21
T23F11.2	unc-38
F46C5.4	Y54F10AM.6
W01G7.2	K05F1.6
hse-5	cysl-2
vab-10	cct-1
F20D6.2	Y41E3.8
rom-1	gst-21
cyp-35A4	ben-1
egg-1	K12H4.2
col-33	C08G5.7
ZK669.5	VM106R.1
F59G1.8	C05D11.1
W02B8.2	Y44A6C.1
linc-8	mif-2
C18B2.3	F45E4.5
kcc-2	far-5
dod-3	rei-2
Y75B12B.1	ins-33
M02B7.2	H40L08.2
F40H6.6	ldb-1
wht-7	H14E04.3
Y116A8C.25	ent-2
H14A12.5	cids-2
C04A11.t1	Y73F8A.5
21ur-328	olrn-1
T23F2.5	Y48G8AL.7
ctsa-3.1	acr-19
abts-4	C32B5.18
nhr-71	B0410.3
F09F9.1	lrp-1
asah-2	C35A5.6
spe-11	Y113G7C.1
dhhc-2	T23B3.5
endu-2	C07A4.2
col-95	Y57G11C.46
ser-5	npr-27
odr-1	zig-10
let-765	K09E4.1
C33D9.8	K09F6.3
C31H1.5	lfe-2
crn-4	hot-7
msp-65	ceh-74
nasp-2	ethe-1
coh-3	spch-3
peel-1	flp-19
C04G2.9	F22F7.7
gap-2	unc-98
E02A10.4	ceeh-2
M7.9	K09F6.7
C36H8.1	F53F4.16
lin-24	ttr-8
fbxa-189	T01D1.4
ints-1	msp-3
ncs-6	casy-1
F27D4.6	C13G5.2
C04A11.5	T19B10.2
C18H7.7	cng-1
spd-1	fbxa-3
F10E7.9	Y38H6C.9
T05H4.15	F44E7.4
M05D6.5	C01G5.3
nspd-7	T05A1.5
R10E9.2	K03B8.6
F09C11.2	dpff-1
him-3	C45G9.12
bath-7	grk-1
Y73F8A.32	Y37F4.2
prk-2	stg-2
F32B4.5	tbh-1
pcs-1	H14A12.3
npr-15	col-125
linc-24	rps-29
T28H10.3	cah-4
cwn-1	B0280.2
Y26D4A.19	fbxa-34
W10C8.6	ins-18
F19B2.6	ddr-2
nmat-1	pph-2
lrch-1	R119.2
C31B8.2	R11H6.4
msp-71	Y75B8A.13
D2096.13	F39E9.18
gpx-4	F41D9.2
unc-104	scb-1
iglr-2	C04H5.7
fbxa-217	mek-1
slc-17.2	hpo-27
F14H8.5	tns-1
Y45F10B.13	rpl-37
linc-11	acly-1
C18A11.1	F37A4.4
cey-2	F55B11.3
K10B2.4	F40F8.1
heri-1	catp-3
comp-1	ZC302.3
C27B7.5	col-168
F49E10.4	Y34D9A.3
F38A6.4	F59A7.2
hlh-14	spe-15
egl-36	gfi-3
F30A10.11	T28C6.10
F53B3.6	C49F5.8
arx-7	tre-2
Y54E5A.5	aak-2
F20H11.4	C42D4.18
tnt-4	ints-11
Y53F4B.45	lin-25
T06G6.4	Y67A10A.10
B0205.10	C10C6.7
ifc-1	Y38F1A.8
T02E1.6	Y49F6B.9
prx-11	R10D12.13
K08E5.7	ceh-21
F22H10.2	F56F3.4
eff-1	zyg-9
ztf-17	cey-1
C08F11.13	C34E10.10
cebp-1	rps-24
scav-6	sly-1
Y62H9A.11	F55A11.4
plk-2	cbp-1
Y57G7A.3	C35C5.9
R04E5.7	T12A7.7
F10C1.9	trf-2
C32D5.4	fis-2
unc-8	ctsa-1.2
ZK512.8	vha-2
fat-2	agr-1
ZC443.4	rig-1
mod-1	C17G10.7
abu-13	R04F11.3
pgal-1	sel-10
Y45F3A.4	srz-24
Y43F8A.2	egl-45
Y54G2A.18	Y59E9AL.5
21ur-2429	F54B11.14
Y53F4B.19	gpx-6
nhr-173	Y42A5A.1
srb-1	srsx-31
mir-86	efn-4
F18A11.5	rbg-1
C16A11.5	B0250.4
C14C10.1	F52H2.7
nfm-1	F46G10.1
F21C10.7	ints-1
K02E10.7	K09C6.9
Y56A3A.33	C05C10.7
clec-125	F10E9.5
Y71G12B.33	lrk-1
add-2	F28B12.6
pud-3	Y51B9A.5
flp-24	mtm-6
ZK616.1	rnp-2
F53E10.5	rcs-1
ipla-7	hsp-90
F57A8.4	nlp-40
pezo-1	ulp-2
best-14	linc-11
dgtr-1	slc-17.1
msrp-3	Y37E3.1
srh-146	R05G6.5
C06E4.2	dach-1
spp-23	K11H3.4
imp-1	gsk-3
flp-5	F40G9.6
C44B7.7	npr-15
Y49F6C.8	E04F6.8
C46G7.1	R11G1.2
smz-1	Y26D4A.5
ugt-19	nhr-114
msp-51	B0238.11
K02D3.1	rnst-2
ZK418.7	cyp-33C9
amt-3	ZK354.3
mec-6	T23E1.2
snt-3	gas-1
popl-7	F28H6.6
C34F6.9	rab-6.2
Y43D4A.8	cutl-16
srh-275	ints-2
T08G5.15	ncx-4
inx-15	T27E4.1
F58A6.9	sfxn-2
F19B6.10	oxy-5
F46C5.11	arx-1
unc-22	ZK973.11
Y38H6C.15	K01A2.4
msp-55	pals-30
R04F11.18	kin-29
spch-3	pxf-1
R08C7.5	F10E9.12
C03B1.5	col-75
dhs-29	nlp-24
W01A8.8	F46C8.1
rhr-1	unc-46
C33C12.4	ZC247.2
F32H2.7	W02B8.1
pcn-1	Y42A5A.3
VM106R.1	abts-1
abhd-11.2	vit-1
ZK688.7	W10C8.6
H14A12.3	T04A6.1
lips-15	F14D7.11
Y55F3BR.19	F58A3.6
T27C10.8	F33D11.16
F27C1.1	F25E5.5
M04F3.4	T08G11.3
F11G11.4	svh-5
ipgm-1	gck-4
ddi-1	ceh-27
ZK1307.4	E01G4.7
F26A10.28	col-180
ugt-26	ZK370.4
K08D12.4	F23A7.3
ddo-1	col-71
rrf-2	sptf-1
K11E4.2	coh-4
pck-3	K11C4.1
unc-60	cdr-4
nspd-9	pqn-88
sql-1	ptr-23
glb-1	CD4.10
alg-3	ugt-8
C49F8.1	ttr-5
linc-25	flp-13
F26A1.9	C44B7.5
F13D12.10	F11C3.1
Y80E2A.1	ctf-8
T03G6.3	F36H12.5
Y102A11A.3	dpy-4
flp-25	ubh-2
nhr-31	K01H12.4
ZK1307.1	R05C11.2
K11C4.10	let-522
C30A5.10	nra-4
pnk-1	imph-1
21ur-6238	har-1
nlp-43	flp-32
swt-4	F16B12.6
clec-153	rpl-18
21ur-2808	F58F12.3
T09A12.1	Y57G11C.22
nhr-243	zig-7
Y54E2A.7	F10E9.18
K07A1.4	T27D12.6
C31B8.9	T26H5.14
C25E10.12	sec-16A.1
Y38E10A.17	F55D1.1
F36D3.4	F53B2.8
W06F12.7	hmr-1
T02E9.27	xpb-1
T21B4.21	lpd-3
sfxn-1.1	F56E10.1
R05D3.2	W05B10.6
ceh-19	rpl-28
spe-43	nlp-9
rskn-2	fipr-20
btb-19	panl-2
F10G2.1	ptc-1
pola-1	alh-10
atg-5	C17E4.2
F16B4.4	cpg-7
F15A2.8	F07H5.5
mrps-18A	rps-23
C52E4.17	dsb-3
arrd-14	T24B8.3
C10C6.7	F57A8.1
T04H1.5	F11C7.2
lact-5	E01G4.6
twk-17	gar-3
R04D3.3	egl-15
ppw-2	cyc-2.1
osm-9	cla-1
msd-4	F22D6.15
srr-10	F09G2.2
F52E1.9	W07A12.8
Y47D9A.5	rps-5
vha-7	F09F9.11
cccp-1	R03A10.8
Y11D7A.8	F42H10.3
C23H5.12	T24A6.20
C48D5.7	mir-5548
wago-1	dcs-1
cep-1	K11H12.8
C18B2.5	sax-7
fnci-1	T28B11.1
nep-9	C36B7.2
mlc-4	C34E11.9
Y73E7A.6	K10C9.7
F36A4.4	mrpl-13
AH6.3	not found
ceh-34	klp-12
nhr-83	pes-4
ZK816.1	dlg-1
msp-78	pmp-3
Y71H2AM.4	bli-1
F54D10.7	madd-4
puf-3	F23A7.8
rps-12	fbxa-137
Y18D10A.23	dct-9
tni-3	R04A9.3
Y17D7C.3	linc-21
ric-8	T11G6.11
ZK867.11	eel-1
col-19	C30E1.9
B0222.5	W02D9.10
H32K16.2	Y82E9BR.17
spch-1	F21H7.2
F25F8.1	Y69A2AR.49
Y37E11AL.2	fdps-1
camt-1	F58D5.5
T19C4.5	K07E12.2
F19G12.8	C18E9.8
nasp-1	F28B3.6
T26H5.14	Y71H2AM.20
C48C5.8	catp-4
C32E8.4	Y75B8A.44
del-4	C49F8.1
Y82E9BR.1	snpn-1
ZC53.4	M05B5.4
vps-36	C13G3.1
F31E3.2	Y55B1BR.7
Y59E9AL.8	C04G6.2
sdhb-1	cku-80
tbc-16	mdt-10
ZK1320.13	C15C6.3
cas-1	ttll-9
F58A4.2	mrps-11
dscc-1	ubc-7
21ur-3864	inf-1
rpn-6.1	F21H7.5
trx-3	rnh-1.0
pct-1	F49H12.4
F16B4.7	not found
F37A8.1	coa-3
obr-2	C41D11.6
K09F6.6	C25D7.16
lin-54	Y106G6E.7
F15G9.6	R01H2.7
C27D8.4	cho-1
F45E1.4	pnc-1
F25E5.4	nhr-18
C02H6.3	kap-1
mfb-1	F09E5.16
gst-11	piga-1
Y116F11A.4	hpo-10
Y54E10BR.2	ave-1
T02B11.9	aman-2
F46F2.5	cct-6
upp-1	linc-35
F36H1.3	C47E8.3
ubc-3	linc-1
cTel55X.1	inx-12
F55A11.8	nas-10
F52F12.8	ceh-31
clp-8	C32D5.8
fbxa-59	ttr-2
Y37E11AL.1	pcbd-1
M01G4.1	cyn-7
F10D11.3	hda-6
bus-18	atic-1
ZK593.9	T26A8.1
cest-25	msrp-1
T02D1.8	pcyt-1
C25D7.12	acc-2
nlp-50	adbp-1
Y46G5A.43	abt-2
cpr-6	rps-10
R105.1	T28D6.3
npr-6	Y37E11AL.12
arrd-25	toca-1
F02C12.2	Y41D4B.1
F40F9.3	nlp-62
Y59E9AL.5	F46B6.2
spp-10	cogc-8
K02A11.2	ift-81
trpl-2	nhr-62
Y41E3.8	tbc-3
F16A11.5	jnk-1
K11H3.2	jip-1
fbxa-146	rpl-15
F53B6.4	JC8.17
lipl-2	rps-14
C14B1.8	F31E3.12
T20G5.13	not found
C17F3.1	glb-14
T15B7.14	C24D10.2
D1007.15	str-253
T11G6.5	M02D8.6
C54C6.5	ZK813.7
F46G10.2	D1086.8
C56E10.3	ins-27
zip-1	ttr-34
F58H1.6	flp-15
Y42H9AR.4	F46A9.1
Y76B12C.4	F12A10.1
ZK742.6	rpb-2
glb-28	C52G5.2
F48F5.6	pgp-5
K10D3.6	F39E9.7
C18E9.7	cah-3
F31B12.3	acp-6
baf-1	cle-1
sedl-1	Y116A8C.23
Y15E3A.5	ubr-1
gadr-5	tat-5
C13G5.2	hprt-1
R09F10.3	Y76B12C.8
Y105E8A.27	rps-15
C50F4.10	glb-24
txt-1	mtl-2
C41G7.7	Y53F4A.2
Y105C5B.18	F35D2.3
C26C6.8	F48D6.4
WBGene00013274	osm-5
col-71	C24B5.1
spp-1	dct-18
mrp-1	M02B1.2
nhr-14	skr-20
F19B10.1	unc-87
T20G5.12	ceh-13
H34C03.18	prp-8
F37A8.5	capg-1
C05G5.10	Y37A1A.4
R10E11.6	let-418
F57E7.1	C23H4.6
T01C3.3	Y43F8B.11
set-30	col-107
K07C5.3	T04F3.4
cest-2.1	unk-1
ech-3	gst-16
gbh-2	F20D6.8
nhr-40	ttx-7
F08G12.11	ptb-1
F15E6.9	F36H5.4
ser-3	npp-24
W03F11.4	F44F1.4
F58F12.2	C31G12.4
ctsa-1.2	F35E12.6
srh-98	D1086.7
ceh-48	DH11.2
ZC434.10	F54E4.3
F33H12.7	kcc-2
T12B3.1	nspd-7
ifb-2	msp-49
gpd-1	drh-3
taf-11.2	sar-1
C35B1.7	C17C3.15
R02D5.1	goa-1
C01F6.2	clec-48
F54F7.6	acdh-7
K04G11.3	qua-1
F32A11.3	C09B9.7
dpf-2	Y80D3A.9
21ur-7419	T01D3.3
F31E8.5	linc-42
memi-2	fog-3
clec-265	Y69H2.17
irld-15	B0198.2
21ur-9485	F13D12.10
F26A1.8	F08F8.4
F36D1.7	sax-3
fshr-1	F23F1.7
mtss-1	rab-7
scc-1	rla-2
erd-2.1	col-145
zig-8	F14E5.2
DH11.7	Y65B4A.2
col-180	C26B2.7
K01A2.3	emb-5
E02H9.3	Y39A1C.1
F31A9.2	ZC412.3
Y43F8C.13	R05A10.2
F14H12.9	M05B5.3
nhr-133	pdi-6
C53B4.3	F08G5.3
col-20	aco-1
ceh-82	Y37E3.8
dgn-1	Y39B6A.33
msa-1	acdh-13
haf-9	K02E11.3
K10G4.3	C50F4.10
F49E7.5	utp-20
F52C6.3	unc-62
rop-1	F31E9.6
alh-1	grd-17
C30H6.12	rpl-13
oac-42	rpoa-1
clp-7	F54B11.4
ippk-1	hpk-1
sri-74	pfd-4
T01B11.1	rps-28
F42G8.8	M7.7
ogr-2	npr-25
phat-8	cdk-11.1
C34F6.10	F09B12.7
gpa-6	his-71
osm-7	F10G7.5
H10E21.5	cdc-48.3
ZK154.4	daf-2
Y71H2AM.6	str-162
F18A1.7	acdh-8
Y73B6A.16	col-65
mec-12	F01E11.3
C24D10.2	aakg-5
F52D10.2	C08F11.6
T08B2.4	dre-1
irld-10	rpl-24.2
T20F10.2	M28.9
sre-36	ZK813.1
F19G12.4	cest-24
msp-42	nhr-88
T04C9.8	F09C6.11
adr-2	Y23H5A.8
C27D8.1	hot-3
mua-6	copa-1
F40G9.6	D1054.10
abcf-1	dpy-14
eif-1.A	gnrr-4
F40F8.1	H05L14.1
R07E4.1	cand-1
gln-3	dos-1
T04C12.14	cas-1
T06A1.5	rpn-12
ntr-2	C44C1.6
bath-14	F59A3.10
oma-1	lec-9
DH11.5	atf-7
Y38H8A.2	lep-5
F56B3.6	K10D6.2
npr-18	dsb-1
E02H9.6	col-176
gsp-4	sek-1
fbxa-206	tmbi-4
C09G5.7	F38B2.6
F08B4.8	Y34F4.2
T19C3.3	ari-1.4
F57F4.4	golg-2
icd-2	B0303.4
W09C3.3	col-150
cdc-25.3	F14B8.5
T11F8.12	F15A2.8
F44A2.11	C05D9.12
ssp-19	H35B03.1
asd-2	gadr-5
F14F9.3	C25D7.10
tts-2	F55G11.2
Y73F8A.15	nhr-67
T19H5.4	Y60C6A.1
let-23	str-1
srx-6	rpl-36
nlp-34	sto-6
pqn-92	sre-4
dct-6	sec-16A.2
C34D4.2	mrps-9
T04B2.8	ttll-5
Y73C8B.3	C18H2.4
lpr-2	asns-2
C23H5.8	nuo-4
R01H2.4	rpl-17
aqp-10	sru-26
nlp-33	act-2
sri-48	T28H10.1
C27C12.1	old-1
msp-113	C40C9.3
pak-1	gst-24
F47F2.1	Y37E11B.10
Y47H10A.4	snx-14
K02F6.7	K07H8.5
smg-5	flp-3
alh-13	21ur-15462
egl-3	F56H9.9
F46A9.1	F49D11.10
haao-1	cka-1
vps-2	trpp-5
clsp-1	qui-1
tsp-20	E01G6.2
F39F10.4	rund-1
F43E2.6	linc-133
tsp-6	Y106G6H.16
gnrr-1	Y62H9A.3
F16B4.6	paic-1
spp-13	twk-5
inx-7	rbf-1
Y46H3C.5	F14D7.12
37316	ser-3
F58B4.7	F13A7.1
hcp-3	K02F2.5
D1086.7	msh-4
T09B4.8	W05B5.1
W09D6.5	F49F1.5
C11H1.9	ugt-46
C54D10.17	K07D4.1
K09D9.1	F09E10.1
pqn-75	Y116A8C.43
Y119D3B.13	T23B12.8
anr-20	knl-2
fbxa-106	gadr-3
F48G7.15	F30A10.13
unc-85	flp-11
dmd-10	mrpl-21
C33F10.1	F55H12.4
irld-8	H22K11.5
bli-5	ptp-5.2
math-26	rhr-1
ZC395.5	C03C10.5
C54D10.4	wdr-5.1
rmd-3	clh-4
C54F6.18	VW02B12L.2
ZK858.2	F18E3.11
C30G4.4	F44E7.3
srh-189	W09C5.7
Y8A9A.2	col-165
plg-1	F55F8.7
T04B8.5	unc-7
skr-10	F59B2.15
C14B9.2	T13H5.6
slc-25A10	B0334.3
ant-1.3	ceh-19
C47A4.5	ceh-49
rpm-1	snrp-200
bath-24	C08G9.1
F07H5.10	C35D10.6
T28C6.5	col-53
nfki-1	ZK546.3
H23N18.5	col-96
rpl-25.2	C10H11.11
srw-130	cul-6
rps-25	F29B9.12
cpg-1	xnp-1
R05H5.4	arrd-20
snpc-3.1	B0272.3
fbxb-69	dao-2
F58A6.5	cdkl-1
F55B11.4	C49C3.4
D2096.12	pha-4
Y26D4A.12	ZK1307.7
acs-18	clec-190
C11D2.3	Y102E9.5
T19F4.7	F43C9.2
rmh-1	upp-1
R09F10.1	trpp-6
M60.11	ZK909.3
F45D3.3	F36A4.4
ZK353.3	F27D4.4
Y102A11A.2	cap-2
frpr-13	F33D11.7
F26D11.13	W04G3.5
Y55B1AR.4	ccpp-1
cutl-12	C29E4.15
T19D12.5	act-5
C14F11.26	ech-3
W09C3.2	T05D4.5
K03H1.9	avr-15
fce-1	F57C2.5
fbxa-100	F56D6.19
ncx-2	col-43
F41C6.6	rei-1
cyc-2.1	hap-1
lgl-1	F40D4.13
F37A4.4	Y1A5A.1
R07E5.15	aps-3
col-138	lgc-12
F10G2.7	B0495.5
F44F4.9	C15C7.4
daf-22	R12B2.8
F56D6.19	Y73C8B.3
Y102A5C.36	ptp-5.1
C04F12.8	F59A7.5
plx-2	cdh-4
B0399.t2	mom-2
ztf-27	not found
ZC395.4	C32D5.11
lbp-9	C04E7.3
C11H1.7	lron-12
F27E5.7	Y71F9AL.7
T03F6.7	C14A11.9
plp-2	ndk-1
abts-2	gcsh-2
linc-35	srg-65
EGAP1.1	C26C6.4
ZC434.8	fbxb-43
srg-65	ssp-34
F35C8.8	F53C3.4
D1081.12	B0348.10
K10G4.10	ZK643.2
F32A6.8	nhr-102
riok-2	znfx-1
C06E7.92	R07E5.17
K09A9.8	wrt-10
fib-1	F53F4.13
F09B12.3	F55F8.2
F26B1.8	rpl-7
F55F8.7	T10D4.6
F19G12.3	hmit-1.3
Y57G7A.6	dmd-7
ZC266.1	math-23
cyp-14A2	F54C9.3
psf-3	dbr-1
21ur-9231	set-16
21ur-12501	gkow-1
T02E9.26	pat-2
F11E6.10	C04F12.8
str-130	Y34D9A.7
WBGene00018876	nlp-58
rad-50	cdk-11.2
ZK867.2	stl-1
K09F6.4	vps-8
Y37E11B.5	aat-3
W02G9.4	glrx-22
K02E2.6	Y54H5A.5
srj-10	ZK418.2
ZK994.6	hpl-1
mps-1	C43E11.9
paf-1	acs-6
xpa-1	not found
C44B9.3	glb-2
C14A6.13	rps-26
T25B2.2	Y97E10C.1
C10G8.8	uggt-1
clec-65	col-81
F26A10.2	C27D6.3
rps-14	F07C3.9
21ur-12301	C31H5.5
pitr-5	W08D2.9
oac-50	sup-1
W07B8.4	ucr-2.1
mdt-20	msp-78
ZK524.4	flh-2
his-41	cogc-6
WBGene00022116	C06G3.8
unc-129	C53H9.2
xpo-3	tax-2
T04C4.3	nfki-1
cyp-35A5	T26H2.10
gln-5	F30F8.9
F36H12.5	sbt-1
C27D6.3	C54C6.6
T24C4.4	dcr-1
F58B3.6	ZK863.1
aex-1	fem-1
sss-1	crn-5
mir-264	comt-3
T01G1.4	ubl-1
sst-20	toc-1
F07C6.4	Y75B8A.24
C15A11.7	Y71H2B.4
him-8	flr-4
pign-1	Y37A1B.5
kbp-2	21ur-409
C16D9.3	eat-16
dpy-31	dur-1
era-1	ska-1
ttr-38	osta-2
Y37A1A.2	gln-2
pdf-1	snb-2
R08A2.2	B0454.6
F18H3.4	col-133
msp-142	soap-1
fre-1	Y62E10A.6
pgp-5	ZK632.9
Y75B8A.31	B0222.15
umps-1	Y54G11A.7
dac-1	rrp-8
R11G10.3	rpl-42
cest-10	ric-19
col-101	T04C9.8
oac-31	lev-11
ztf-14	Y39B6A.43
csc-1	fipr-1
C49C8.1	fbxb-101
Y71G12B.27	F11A5.15
pll-1	Y43C5A.2
mesp-1	pcyt-2.1
ugt-22	yif-1
aakg-5	Y67H2A.2
hasp-1	txl-1
F30A10.2	Y39H10A.6
obr-3	Y106G6D.8
T22C1.9	F15A8.8
K02H11.4	ced-10
lin-42	cst-1
cdc-25.1	Y73B3A.4
igdb-2	ero-1
F19B2.5	mpc-2
K11D5.1	F44E7.9
ZK1055.4	C17E4.19
B0025.5	linc-94
ZK546.3	ubq-2
perm-3	R01H10.4
linc-153	F53A2.1
lin-41	frm-10
F53A9.8	F54G2.2
ZK686.3	dhs-1
inx-9	C36C9.10
clec-79	ZK1320.7
C49G9.2	hrdl-1
rpl-28	F35F11.2
zig-7	ints-6
T02E9.11	gop-2
F41F3.3	pik-1
ZK1067.3	Y41E3.20
vit-5	rol-6
F22F4.4	D2023.4
msh-6	tbc-7
lron-15	pals-2
clec-166	F22G12.5
W06B4.1	sre-14
tag-241	rnf-5
F56C9.6	Y39B6A.13
acc-4	C32E12.1
ZK546.7	lgc-10
agt-2	nca-2
cutl-13	Y51H1A.3
tsp-9	apm-3
gcy-28	swm-1
C02B10.5	byn-1
rpb-10	rab-11.1
Y51H4A.935	C17F3.1
ZK673.11	Y7A9A.1
F56F10.2	ttr-20
K09F6.3	frh-1
mek-1	cdc-42
aagr-4	sem-4
C25A1.16	K11C4.2
zhit-3	F20D6.2
lrp-1	D2007.2
gss-1	dpy-5
B0273.1	F36D3.4
pgp-3	C01A2.1
srv-4	taf-11.2
K05F1.9	Y54G2A.48
21ur-14377	rom-2
tep-1	K12B6.8
C14C11.7	Y102A11A.15
fhod-1	F28E10.4
C06H2.10	pgph-3
F44G4.3	hif-1
hsp-17	Y34F4.1
puf-11	C14C10.5
T27A3.7	Y53F4B.51
rpl-34	tpst-2
memi-3	lgc-31
K11H12.8	cpz-1
F53A10.2	vps-45
T09B4.3	psr-1
nlp-13	F44E2.7
T01H3.5	gyf-1
irg-4	rgl-1
R74.2	smg-1
scl-25	hrde-4
ncx-4	Y67D8C.12
C06A6.4	rps-27
21ur-14796	drr-1
F53A9.1	W09G3.8
Y24F12A.1	H27A22.1
rnh-1.2	csq-1
C09E7.7	mlck-1
ZK1248.20	fath-1
cpn-1	pamn-1
drd-1	pqn-85
flp-14	Y69E1A.8
E03H12.5	C35B1.3
rab-7	not found
F35C11.4	gsp-4
C14B4.2	rpl-5
ZK1098.9	cyn-16
B0379.2	F56A8.4
mrpl-36	gpa-7
ZK856.11	mpz-1
mob-3	mdt-30
col-108	mboa-7
nhr-54	pfn-3
F23C8.3	F36H1.3
madd-2	ZK930.7
col-137	dmsr-7
sms-2	twk-22
T08D2.3	tax-6
T27E7.1	F39C12.1
F42A10.5	Y57G11C.14
skr-20	ath-1
pqn-52	Y55B1BL.1
nhr-168	Y69A2AR.8
col-48	F26E4.5
elp-1	cit-1.2
nhr-187	fbxa-23
hdl-1	vha-11
F25E5.1	Y47D7A.13
kin-24	phb-1
K07C11.8	D1044.7
lpd-6	F38A5.22
F52G3.6	him-5
hmgs-1	tag-123
puf-5	W04H10.5
sftd-3	apc-10
21ur-11073	lsm-4
Y71G12B.23	atg-9
F28H7.3	Y66H1A.5
F53E10.6	rbm-5
T23B5.3	mex-3
F10E7.5	rab-14
R02F2.8	phat-4
M03F8.3	lfor-1
nmad-1	rps-13
C05D9.12	ZK675.4
F44G4.5	W01F3.2
pfd-3	vps-20
T05A7.1	C30H6.9
sls-2.1	brp-1
phat-7	F21F3.2
F36A2.10	sesn-1
spr-2	eri-12
lec-2	nhx-4
F08H9.4	spsb-1
lmd-3	C18H2.7
asp-13
C03C11.1
dnj-27
E03H12.7
droe-4
blos-8
C14C6.2
cdh-4
F36A4.2
Y71H2AM.10
Y59E9AL.2
mex-1
F35C11.6
abt-5
fbxl-1
mei-2
twk-13
ZK867.7
ZK822.2
B0261.6
H16D19.4
F32B6.4
cbp-3
Y52B11A.8
mif-4
ZK228.4
K06H6.2
H17B01.5
C07H6.2
srv-15
Y69A2AR.8
21ur-333
F08H9.2
mctp-1
ani-3
K11G12.6
sid-2
F56A11.4
rig-3
pgp-7
F53G12.8
B0205.8
fbxa-49
catp-7
Y4C6A.4
ssq-2
ZK945.7
F11E6.3
pcp-2
srxa-2
fbxa-220
cpr-9
C14A11.9
C17F4.7
ssp-31
C29F5.3
ZK867.13
far-1
C54E4.5
Y71F9B.13
srh-247
bli-1
sox-4
Y19D10B.8
ncx-5
linc-58
21ur-5341
oac-41
[truncated: 371 more rows]
