# Supplementary material for: Neuronal calmodulin levels are controlled by CAMTA transcription factors
Source: eLife. 2021 Sep 9;10:e68238. doi: 10.7554/eLife.68238 (PMC8428840; doi:10.7554/eLife.68238)
Supplement: Supplementary file 5. [file elife-68238-supp5.xlsx]

## Sheet: p-value
Figure	Pannel	Comparision	Time points (s)	Test type	p-value	Difference	95% CI of difference
Figure 1
	Figure 1B	npr-1 vs npr-1; camt-1(db973)	60-120	Mann-Whitney	0.000655775
		npr-1 vs npr-1; camt-1(ok515)	60-120	Mann-Whitney	9.35052e-08
		npr-1 vs npr-1; camt-1(db973)	180-240	Mann-Whitney	7.46434e-07
		npr-1 vs npr-1; camt-1(ok515)	180-240	Mann-Whitney	2.96805e-09
	Figure 1C	npr-1; camt-1(db973) vs npr-1; camt-1; camt-1(fosmid::GFP)	60-120	Mann-Whitney	5.90654e-05
		npr-1; camt-1(db973) vs npr-1; camt-1; camt-1(fosmid::GFP)	180-240	Mann-Whitney	5.39172e-08
	Figure 1E	N2 vs camt-1(db973)		Mann-Whitney	0.000548743
	Figure 1F	NaCl: npr-1 vs npr-1; camt-1 (ok515)		Mann-Whitney	0.0159	-0.8015	-1.010 to -0.3695
		NaCl: npr-1; camt-1 (ok515) vs npr-1; camt-1 (ok515);camt-1(fosmid)		Mann-Whitney	0.0159	0.6418	0.2682 to 0.9520
		Benz: npr-1 vs npr-1; camt-1 (ok515)		Mann-Whitney	0.0002	-0.1158	-0.1653 to -0.07581
		Benz: npr-1; camt-1 (ok515) vs npr-1; camt-1 (ok515);camt-1(fosmid)		Mann-Whitney	0.0002	0.1175	0.07783 to 0.1698
		DI: npr-1 vs npr-1; camt-1 (ok515)		Mann-Whitney	0.0002	-0.3536	-0.4465 to -0.2190
		DI: npr-1; camt-1 (ok515) vs npr-1; camt-1 (ok515);camt-1(fosmid)		Mann-Whitney	0.0002	0.5156	0.4134 to 0.5877
	Figure 1G	npr-1 vs npr-1; camt-1(ok515)		Mann-Whitney	2.3434e-10
		npr-1 vs npr-1; camt-1(db1258)		Mann-Whitney	7.27088e-13
		npr-1 vs npr-1; camt-1(db1259)		Mann-Whitney	8.48144e-08
		npr-1 vs npr-1; camt-1(db1260)		Mann-Whitney	1.11571e-11
Figure 2	Figure 2A	npr-1; camt-1(db973) vs npr-1; camt-1(db973); rab-3p::camt-1a	0-120	Mann-Whitney	7e-11
	Figure 2B	npr-1; camt-1(ok515) vs npr-1; camt-1(ok515); hsp-16.41p::camt-1	0-120	Mann-Whitney	0.08
	Figure 2C	npr-1; camt-1(ok515) vs npr-1; camt-1(ok515); hsp-16.41p::camt-1	0-120	Mann-Whitney	3e-07
Figure 3	Figure 3A	npr-1 vs npr-1; camt-1(db973)		Mann-Whitney	0.000837314
	Figure 3B	N2 vs camt-1(db973)		Mann-Whitney	0.000217228
	Figure 3C	npr-1 vs npr-1; camt-1; gcy-32p::camt-1		Mann-Whitney	0.000552002
	Figure 3D	N2 vs flp-17p::camt-1		Mann-Whitney	1.20089e-06
Figure 4	Figure 4C	URX/AQR/PQR: npr-1 vs npr-1; camt-1(ok515)		Mann-Whitney	0.0079	-245.2	-295.1 to -110.8
		BAG: npr-1 vs npr-1; camt-1(ok515)		Mann-Whitney	<0.0001	-591.549	-672.762 to -360.380
		RMG: npr-1 vs npr-1; camt-1(ok515)		Mann-Whitney	0.0286	-169.036	-438.506 to -120.104
		AFD: npr-1 vs npr-1; camt-1(ok515)		Mann-Whitney	0.0079	-403.756	-716.667 to -333.410
	Figure 4D	npr-1; camt-1 vs npr-1; camt-1; rab-3p::cmd-1		Mann-Whitney	6.8e-18
		npr-1 vs npr-1; camt-1; rab-3p::cmd-1		Mann-Whitney	0.292
	Figure 4E	NaCl: npr-1 vs npr-1; camt-1 (ok515); rab-3p::cmd-1		Mann-Whitney	0.52	-0.04637	-0.109067 to 0.0875250
		NaCl: npr-1; camt-1 (ok515) vs npr-1; camt-1 (ok515); rab-3p::cmd-1		Mann-Whitney	0.0002	0.707233	0.595738 to 0.781772
		NaCl: Non transgenic vs npr-1; camt-1 (ok515)		Mann-Whitney	0.07	0.130579	-0.0104080 to 0.213929
		NaCl: Non transgenic vs npr-1; camt-1 (ok515); rab-3p::cmd-1		Mann-Whitney	0.0002	-0.576655	-0.689624 to -0.487900
		Benz: npr-1 vs npr-1; camt-1 (ok515);rab-3p::cmd-1		Mann-Whitney	0.13	-0.0527035	-0.197512 to 0.00602200
		Benz: npr-1; camt-1 (ok515) vs npr-1; camt-1 (ok515);rab-3p::cmd-1		Mann-Whitney	0.0002	0.763169	0.566716 to 0.825769
		Benz: Non transgenic vs npr-1; camt-1 (ok515)		Mann-Whitney	0.09	0.141886	-0.00907500 to 0.289659
		Benz: Non transgenic) vs npr-1; camt-1 (ok515); rab-3p::cmd-1		Mann-Whitney	0.0002	-0.621283	-0.701389 to -0.423423
		DI: npr-1 vs npr-1; camt-1 (ok515);rab-3p::cmd-1		Mann-Whitney	0.44	-0.143363	-0.243663 to 0.149049
		DI: npr-1; camt-1 (ok515) vs npr-1; camt-1 (ok515);rab-3p::cmd-1		Mann-Whitney	0.0006	0.484058	0.294505 to 0.712644
		DI: Non transgenic vs npr-1; camt-1 (ok515)		Mann-Whitney	0.72	-0.05901	-0.169646 to 0.236730
		DI: Non transgenic vs npr-1; camt-1 (ok515); rab-3p::cmd-1		Mann-Whitney	0.0047	-0.543068	-0.777037 to -0.270304
	Figure 4F	npr-1; camt-1 vs npr-1; camt-1; rab-3p::cmd-1		Mann-Whitney	8.9e-05
		npr-1 vs npr-1; camt-1; rab-3p::cmd-1		Mann-Whitney	0.55
	Figure 4G	N2 vs camt-1(ok515)		Mann-Whitney	0.0154786
		camt-1(ok515) vs camt-1(ok515); rab-3p::cmd-1		Mann-Whitney	3.70512e-05
	Figure 4H	npr-1 vs npr-1; camt-1(ok515)		Mann-Whitney	3.52716e-10
		npr-1; camt-1(ok515) vs npr-1; camt-1(ok515); rab-3p::cmd-1		Mann-Whitney	0.00202732
Figure 5	Figure 5A	(w, cn1,tes2) vs (w, cn1 )		One sample Wilcoxon	0.0313	-0.5051	-0.6046 to -0.4306
		(w, sb, cro) vs (w,sb)		One sample Wilcoxon	0.0313	-0.401	-0.6181 to -0.2443
	Figure 5C	(w, cn1,tes2) vs (w, cn1, )		One sample Wilcoxon	0.0313	-0.617031	-0.663027 to -0.546695
		(w, sb, cro) vs (w,sb)		One sample Wilcoxon	0.0313	-0.4697	-0.6208 to -0.2566
	Figure 5D	(w, sb, cro) vs (w,sb)		Mann-Whitney	0.0004	24.02	11.92 to 36.65
Figure 6	Figure 6B	npr-1 vs npr-1; db1275		Mann-Whitney	0.172
		npr-1 vs npr-1; db1280		Mann-Whitney	0.478
		npr-1 vs npr-1; db1278		Mann-Whitney	9.75e-17
		npr-1; db1279 vs npr-1; db1279; cmd-1p::gfp		Mann-Whitney	4.59e-24
	Figure 6C	NaCl: npr-1 vs npr-1; db1278		Mann-Whitney	0.0002	-0.197061	-0.347876 to -0.110594
		NaCl: npr-1; camt-1(ok515) vs npr-1; db1278		Mann-Whitney	0.5054	0.091785	-0.0652660 to 0.166193
		NaCl: npr-1; db1278 vs npr-1; db1278; rab-3p::cmd-1		Mann-Whitney	0.0281	0.149419	0.0604040 to 0.300909
		Benz: npr-1 vs npr-1; db1278		Mann-Whitney	0.0281	-0.0914895	-0.163006 to -0.0173390
		Benz: npr-1; camt-1(ok515) vs npr-1; db1278		Mann-Whitney	>0.9999	-0.0090095	-0.0696540 to 0.100390
		Benz: npr-1; db1278 vs npr-1; db1278; rab-3p::cmd-1		Mann-Whitney	0.0148	0.149632	0.0295160 to 0.230323
		DI: npr-1 vs npr-1; db1278		Mann-Whitney	0.0003	-0.455126	-0.542853 to -0.264300
		DI: npr-1; camt-1(ok515) vs npr-1; db1278		Mann-Whitney	0.0205	-0.1259	-0.1818 to -0.01454
		DI: npr-1; db1278 vs npr-1; db1278; rab-3p::cmd-1		Mann-Whitney	0.0003	0.4677	0.3480 to 0.5021
Figure 7	Figure 7B	rab-3p::mCherry vs rab-3p::cmd-1::SL2::mCherry		Mann-Whitney	<0.0001	-0.2378	-0.2602 to -0.2013
		rab-3p::cmd-1::SL2::mCherry vs camt-1(syb1919); rab-3p::cmd-1::SL2::mCherry		Mann-Whitney	<0.0001	0.3407	0.2797 to 0.3578

## Sheet: Exact n number
Figure	Pannel	Sample	Time points (s)	N number or Replicates	Unit
Figure 1
	Figure 1B	npr-1	60-120	39	Animals
		npr-1; camt-1(db973)	60-120	30	Animals
		npr-1 vs npr-1; camt-1(ok515)	60-120	43	Animals
		npr-1	180-240	39	Animals
		npr-1; camt-1(db973)	180-240	22	Animals
		npr-1 vs npr-1; camt-1(ok515)	180-240	36	Animals
	Figure 1C	npr-1	60-120	75	Animals
		npr-1; camt-1(db973)	60-120	46	Animals
		npr-1;camt-1mcamt-1(fosmid::GFP)	60-120	53	Animals
		npr-1	180-240	64	Animals
		npr-1; camt-1(db973)	180-240	51	Animals
		npr-1;camt-1mcamt-1(fosmid::GFP)	180-240	58	Animals
	Figure 1E	N2		34	Animals
		camt-1(db973)		29	Animals
	Figure 1F	NaCl (npr-1 )		5	Replicates
		NaCl ( npr-1; camt-1 (ok515))		4	Replicates
		NaCl ( npr-1; camt-1 (ok515);camt-1(fosmid))		5	Replicates
		Benz (npr-1)		8	Replicates
		Benz (npr-1; camt-1 (ok515))		8	Replicates
		Benz (npr-1; camt-1 (ok515);camt-1(fosmid))		8	Replicates
		DI (npr-1 )		8	Replicates
		DI ( npr-1; camt-1 (ok515))		8	Replicates
		DI ( npr-1; camt-1 (ok515);camt-1(fosmid))		8	Replicates
	Figure 1G	npr-1		56	Animals
		npr-1; camt-1(ok515)		82	Animals
		npr-1; camt-1(db1258)		80	Animals
		npr-1; camt-1(db1259)		56	Animals
		npr-1; camt-1(db1260)		63	Animals
Figure 2	Figure 2A	npr-1	60-120	75	Animals
		npr-1; camt-1(db973)	60-120	36	Animals
		npr-1; camt-1(db973); rab-3p::camt-1a	60-120	39	Animals
		npr-1	180-240	82	Animals
		npr-1; camt-1(db973)	180-240	39	Animals
		npr-1; camt-1(db973); rab-3p::camt-1a	180-240	39	Animals
	Figure 2B	npr-1	60-120	50	Animals
		npr-1; camt-1(ok515)	60-120	42	Animals
		npr-1; camt-1(ok515); hsp-16.41p::camt-1	60-120	46	Animals
		npr-1	180-240	50	Animals
		npr-1; camt-1(ok515)	180-240	49	Animals
		npr-1; camt-1(ok515); hsp-16.41p::camt-1	180-240	52	Animals
	Figure 2C	npr-1	60-120	84	Animals
		npr-1; camt-1(ok515)	60-120	70	Animals
		npr-1; camt-1(ok515); hsp-16.41p::camt-1	60-120	56	Animals
		npr-1	180-240	76	Animals
		npr-1; camt-1(ok515)	180-240	68	Animals
		npr-1; camt-1(ok515); hsp-16.41p::camt-1	180-240	57	Animals
Figure 3	Figure 3A	npr-1		15	Animals
		npr-1; camt-1		16	Animals
	Figure 3B	N2		18	Animals
		camt-1(db973)		24	Animals
	Figure 3C	npr-1		19	Animals
		npr-1; camt-1; gcy-32p::camt-1		17	Animals
	Figure 3D	N2		20	Animals
		flp-17p::camt-1		20	Animals
Figure 4	Figure 4A-C	URX/AQR/PQR (npr-1)		5	Replicates
		URX/AQR/PQR (npr-1; camt-1)		5	Replicates
		URX/AQR/PQR (npr-1;gcy-35;gcy-36)		4	Replicates
		URX/AQR/PQR (npr-1;gcy-35;gcy-36;camt-1)		5	Replicates
		BAG (npr-1)		11	Replicates
		BAG (npr-1; camt-1)		10	Replicates
		RMG (npr-1)		4	Replicates
		RMG (npr-1; camt-1)		4	Replicates
		AFD (npr-1)		5	Replicates
		AFD (npr-1; camt-1)		5	Replicates
	Figure 4D	npr-1		185	Animals
		npr-1; camt-1		154	Animals
		npr-1; camt-1; rab-3p::cmd-1		130	Animals
	Figure 4E	NaCl (npr-1)		8	Replicates
		NaCl ( npr-1; camt-1 (ok515))		8	Replicates
		NaCl (npr-1; camt-1 (ok515); rab-3p::cmd-1)		8	Replicates
		NaCl (Non transgenic)		8	Replicates
		Benz (npr-1)		8	Replicates
		Benz ( npr-1; camt-1 (ok515))		8	Replicates
		Benz (npr-1; camt-1 (ok515); rab-3p::cmd-1)		8	Replicates
		Benz (Non transgenic)		8	Replicates
		DI (npr-1)		8	Replicates
		DI ( npr-1; camt-1 (ok515))		8	Replicates
		DI (npr-1; camt-1 (ok515); rab-3p::cmd-1)		8	Replicates
		DI (Non transgenic)		8	Replicates
	Figure 4F	npr-1		28	Animals
		npr-1; camt-1		28	Animals
		npr-1; camt-1; rab-3p::cmd-1		32	Animals
	Figure 4G	N2		20	Animals
		camt-1(ok515)		20	Animals
		camt-1(ok515); rab-3p::cmd-1		20	Animals
Figure 5	Figure 5A	w-; cn1; tes2		6	Replicates
		w-; cn1		6	Replicates
		w-; sb; cro		6	Replicates
		w-;sb		6	Replicates
	Figure 5C	w-; cn1; tes2		6	Replicates
		w-; cn1		6	Replicates
		w-; sb; cro		6	Replicates
		w-;sb		6	Replicates
	Figure 5D	w-; sb; cro		10	Retinae
		w-;sb		9	Retinae
Figure 6	Figure 6B	npr-1		57	Animals
		npr-1; db1275		54	Animals
		npr-1; db1280		49	Animals
		npr-1; db1278		84	Animals
		npr-1; db1278; rab-3p::cmd-1		67	Animals
	Figure 6C	NaCl (npr-1)		8	Replicates
		NaCl ( npr-1; camt-1 (ok515))		8	Replicates
		NaCl (npr-1; db1278)		8	Replicates
		NaCl (npr-1; db1278; rab-3p::cmd-1)		8	Replicates
		Benz (npr-1)		8	Replicates
		Benz ( npr-1; camt-1 (ok515))		8	Replicates
		Benz (npr-1; db1278)		8	Replicates
		Benz (npr-1; db1278; rab-3p::cmd-1)		8	Replicates
		DI (npr-1)		8	Replicates
		DI ( npr-1; camt-1 (ok515))		8	Replicates
		DI (npr-1; db1278)		7	Replicates
		DI (npr-1; db1278; rab-3p::cmd-1)		8	Replicates
Figure 7	Figure 7B	rab-3p::mCherry		60	Animals
		rab-3p::cmd-1::SL2::mCherry		54	Animals
		camt-1(syb1919); rab-3p::cmd-1::SL2::mCherry		43	Animals
